# Supplementary material for: CO2 promoted hydrogenolysis of benzylic compounds in methanol and water
Source: Royal Society of Chemistry journal article supplement (doi:10.1039/c3ra41717d), 2013-01-01
Supplement: c3ra41717d.pdf [file c3ra41717d.pdf]

## Supplementary Information

### CO<sub>2</sub> promoted hydrogenolysis of benzylic compounds in methanol and water

Hsin-Wei Lin, Clive H. Yen, Han Hsu and Chung-Sung Tan\*

Department of Chemical Engineering, National Tsing Hua University,  
No. 101, Section 2, Kuang-Fu Road, Hsinchu 30013, Taiwan.

E-mail: cstan@mx.nthu.edu.tw

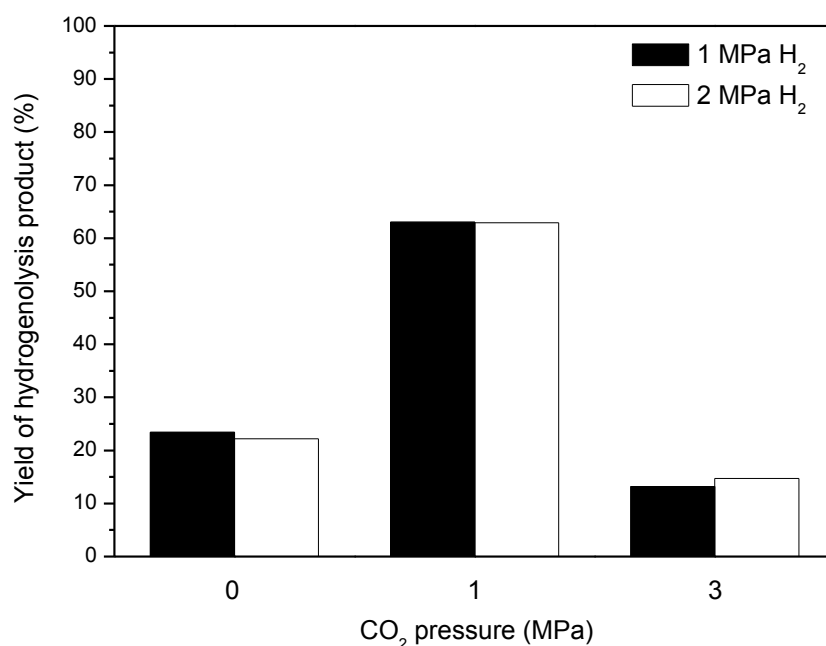

**Fig. S1** Influence of H<sub>2</sub> pressure on the conversion of 1-phenylethanol in CO<sub>2</sub>-expanded methanol. Conditions: substrate 2 g, Pd/C 25 mg, 1 hr, methanol 50 g, 323 K, stirring 1000 rpm.

**Table S1.** Hydrogenolysis of benzyl alcohol in different CO<sub>2</sub>-expanded liquids<sup>a</sup>

| Entry | Solvent     | CO <sub>2</sub> pressure (MPa) | Conversion (%) |
|-------|-------------|--------------------------------|----------------|
| 1     | Neat        | 0                              | 0              |
| 2     | THF         | 0                              | 5              |
| 3     | THF         | 1                              | 5              |
| 4     | THF         | 3                              | 4              |
| 5     | Cyclohexane | 0                              | 10             |
| 6     | Cyclohexane | 1                              | 13             |
| 7     | Cyclohexane | 3                              | 9              |

<sup>a</sup> Substrate 10 g, catalyst Pd/C 50 mg, 3 hr, solvent 50 g, 323 K, H<sub>2</sub> 1 MPa, stirring 1000 rpm.
